# Supplementary material for: Microstructure regulation of resin-based hard carbons via esterification cross-linking for high-performance sodium-ion batteries
Source: Royal Society of Chemistry journal article supplement (doi:10.1039/d3qi00052d), 2023-01-01
Supplement: d3qi00052d1.pdf [file d3qi00052d1.pdf]

## Supporting Information

### Microstructure regulation of resin-based hard carbons via esterification cross-linking for high-performance sodium-ion batteries

Huanyu Zhou, Ning Sun,\* Jiaxu Yu, Razium Ali Soomro, Shaohong Zhang, and Bin Xu\*

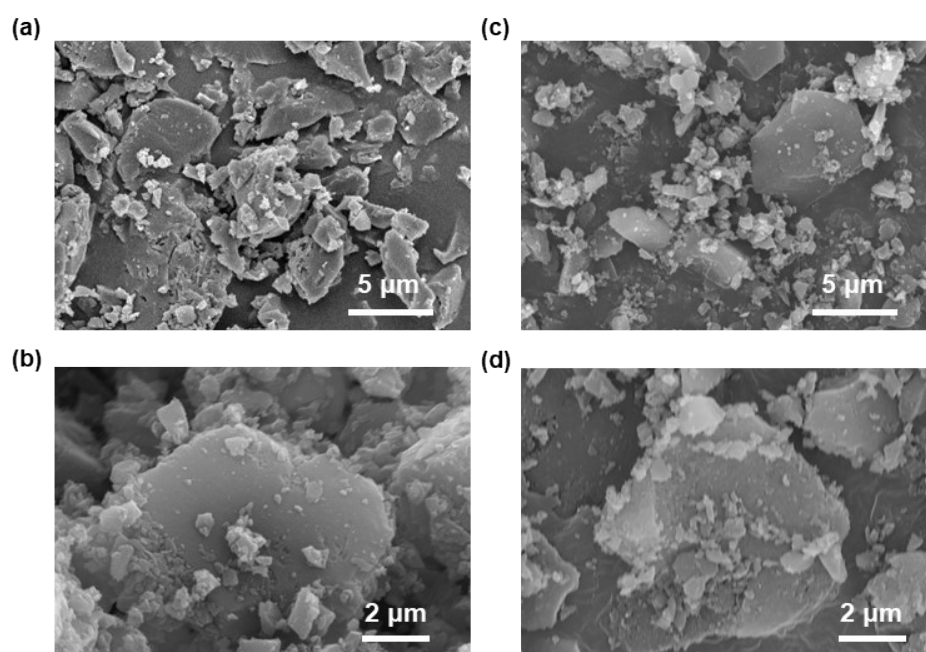

**Figure S1.** SEM images of (a-b) PPFC-1-10-1200 and (c-d) PPFC-1-2-1200.

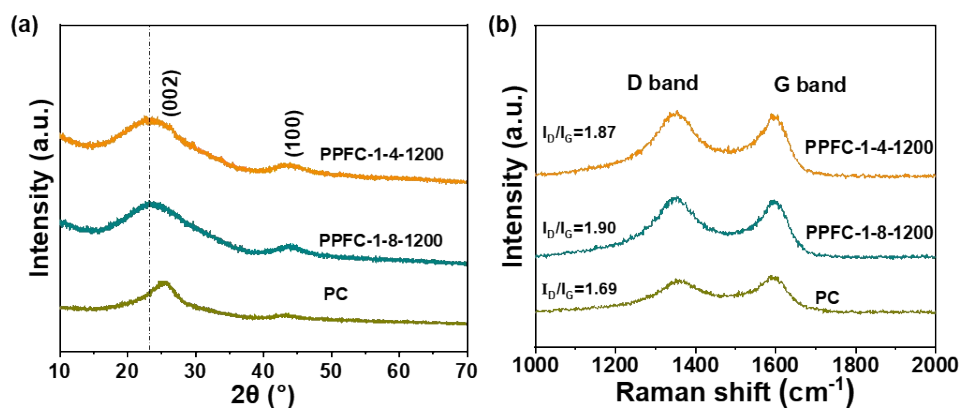

**Figure S2.** (a) XRD and (b) Raman pattern of PC, PPFC-1-8-1200, and PPFC-1-4-1200.

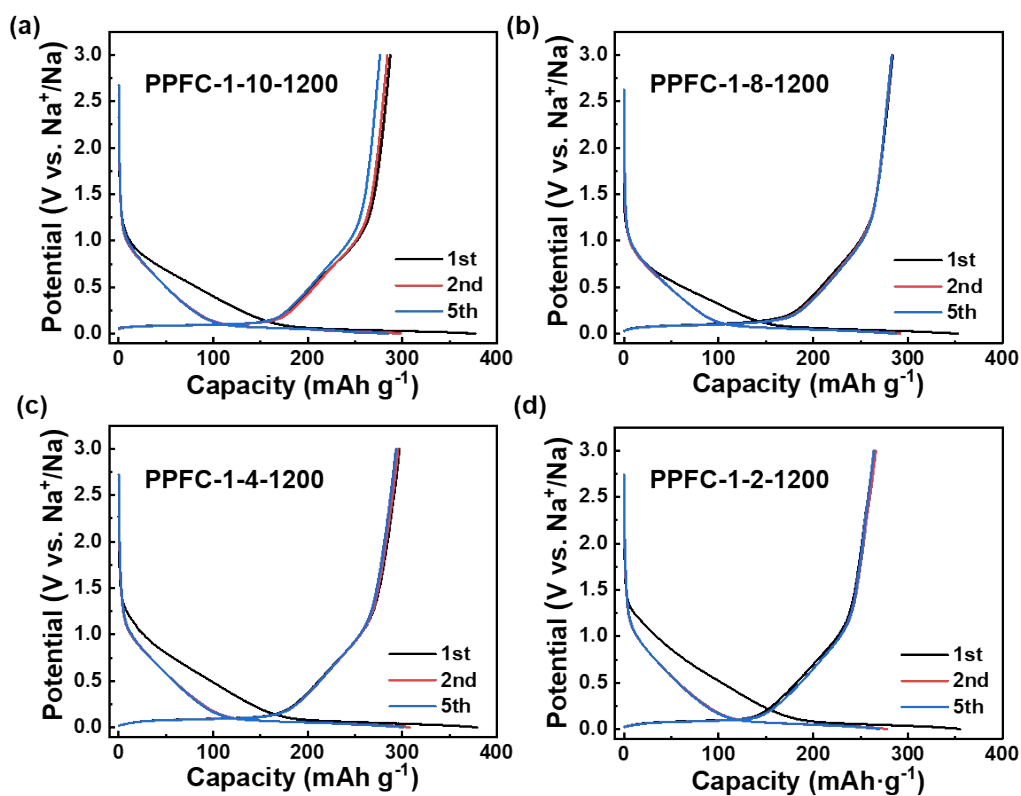

**Figure S3.** The charge/discharge curves at 0.1 C of PPFC electrodes with different PTCDA/PF ratios: (a) PPFC-1-10-1200, (b) PPFC-1-8-1200, (b) PPFC-1-4-1200, and (b) PPFC-1-2-1200.

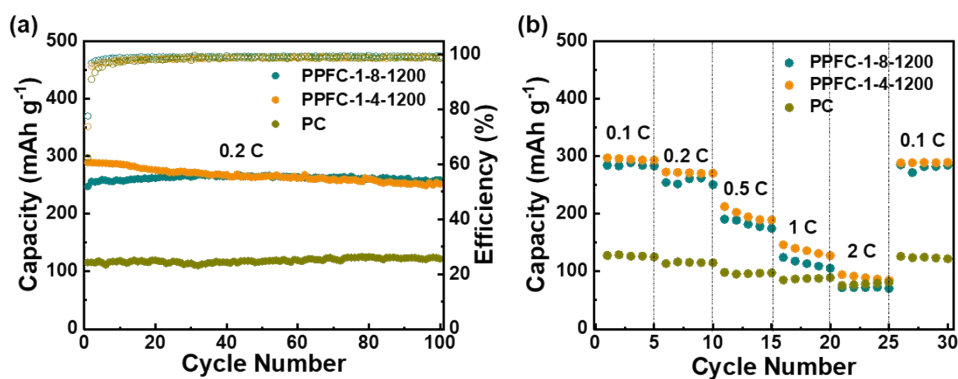

**Figure S4.** Cycle performance at 0.2 C and rate capability of PC, PPFC-1-8-1200, and PPFC-1-4-1200.

**Table S1.** Structure and electrochemical properties of PTCDA modified phenolic resin-based carbon prepared by different PTCDA/phenolic resin proportions.

|                | $d_{002}$<br>/nm | $I_D/I_G$ | Reversible<br>capacity<br>/mAh g <sup>-1</sup> | ICE<br>/% | Capacity at 0.2 C over<br>100 cycles/mAh g <sup>-1</sup> | Capacity at 2<br>C/mAh g <sup>-1</sup> |
|----------------|------------------|-----------|------------------------------------------------|-----------|----------------------------------------------------------|----------------------------------------|
| PFC            | 0.348            | 1.63      | 163.3                                          | 73.3      | 118.6                                                    | 23.0                                   |
| PPFC-1-10-1200 | 0.381            | 1.89      | 287.3                                          | 76.2      | 242.0                                                    | 63.2                                   |
| PPFC-1-8-1200  | 0.384            | 1.90      | 284.0                                          | 80.5      | 258.3                                                    | 71.7                                   |
| PPFC-1-6-1200  | 0.394            | 1.91      | 308.7                                          | 77.9      | 279.8                                                    | 84.7                                   |
| PPFC-1-4-1200  | 0.383            | 1.87      | 297.2                                          | 78.3      | 254.2                                                    | 94.5                                   |
| PPFC-1-2-1200  | 0.374            | 1.85      | 264.4                                          | 74.4      | 246.8                                                    | 101.2                                  |
| PC             | 0.351            | 1.69      | 127.7                                          | 61.5      | 121.7                                                    | 75.6                                   |

**Table S2** Structure and electrochemical properties of PTCDA modified phenolic resin-based carbon prepared at different carbonization temperatures.

|               | $d_{002}$<br>/nm | $I_D/I_G$ | Reversible<br>capacity<br>/mAh g <sup>-1</sup> | ICE<br>/% | Capacity at 0.2 C over<br>100 cycles/mAh g <sup>-1</sup> | Capacity at 2<br>C/mAh g <sup>-1</sup> |
|---------------|------------------|-----------|------------------------------------------------|-----------|----------------------------------------------------------|----------------------------------------|
| PPFC-1-6-1100 | 0.408            | 2.14      | 276.8                                          | 75.5      | 228.6                                                    | 83.7                                   |
| PPFC-1-6-1200 | 0.394            | 1.91      | 308.7                                          | 77.9      | 279.8                                                    | 84.7                                   |
| PPFC-1-6-1300 | 0.379            | 1.87      | 276.0                                          | 80.4      | 226.9                                                    | 56.5                                   |
